## Cardiac reserve and exercise capacity: insights from combined cardiopulmonary and exercise echocardiography stress testing

Pugliese NR.<sup>1</sup>; De Biase N.<sup>1</sup>; Conte L.<sup>2</sup>; Gargani L.<sup>3</sup>; Mazzola M.<sup>1</sup>; Fabiani I.<sup>4</sup>; Natali A.<sup>1</sup>; Dini FL.<sup>1</sup>; Frumento P.<sup>5</sup>; Rosada J.<sup>6</sup>; Taddei S.<sup>1</sup>; Borlaug BA.<sup>7</sup>; Masi S.<sup>1</sup>

<sup>1</sup>Azienda Ospedaliero Universitaria Pisana, Pisa, Italy

<sup>2</sup>Castelnuovo Garfagnana Hospital, Castelnuovo Garfagnana, Italy

<sup>3</sup>National Council of Research, Pisa, Italy

<sup>4</sup>Fondazione Toscana Gabriele Monasterio, Pisa, Italy

<sup>5</sup>University of Pisa, Pisa, Italy

<sup>6</sup>University Hospital of Pisa, Fourth Unit of Internal Medicine, Pisa, Italy

<sup>7</sup>Mayo Clinic, Rochester, United States of America

**Funding Acknowledgements:** Type of funding sources: None.

**Aims.** Combined cardiopulmonary exercise test (CPET) and exercise stress echocardiography (ESE) provides a non-invasive tool to study cardiopulmonary pathophysiology. We analyzed how cardiac functional reserve during exercise relates to peak oxygen consumption (VO<sub>2</sub>).

**Methods and Results.** We performed a symptom-limited graded ramp bicycle CPET-ESE in 30 healthy controls and 357 patients: 113 at risk of developing heart failure (American College of Cardiology/American Heart Association HF Stages A-B) and 244 in HF Stage C with preserved (HFpEF, n = 101) or reduced ejection fraction (HFrEF, n = 143). Peak VO<sub>2</sub> significantly decreased from controls to Stage A-B and Stage C (Table 1). A multivariable regression model to predict peak VO<sub>2</sub> revealed peak left ventricular systolic annulus tissue velocity (S<sup>''</sup>), peak TAPSE/PAPs (tricuspid annular plane systolic excursion/systolic pulmonary artery pressure) and low-load left atrial reservoir strain/E/e<sup>'</sup> were independent predictors, in addition to peak heart rate, stroke volume and workload (adjusted R<sup>2</sup>=0.76, p < 0.0001). The model was successfully tested in subjects with atrial fibrillation (n = 49), and with (n = 224) and without (n = 163) beta-blockers (all p < 0.01). Peak S<sup>'</sup> showed the highest accuracy in predicting peak VO<sub>2</sub> < 10 mL/kg/min (cut-point ≤ 7.5 cm/s; AUC = 0.92, p < 0.0001) and peak VO<sub>2</sub> > 20 mL/kg/min (cut-point > 12.5 cm/s; AUC = 0.84, p < 0.0001) in comparison to the other cardiac variables of the model (p < 0.05).

**Conclusions.** A model incorporating different measures of cardiac mechanics is strongly related to peak aerobic capacity and may help in identifying different causes of effort intolerance from HF Stage A to C.

Table 1

| Variable                                                   | Overall population (n = 387) | Controls (n = 30) | Stage A-B (n = 113) | Stage C-HFpEF (n = 101) | Stage c-HFrEF (n = 143) | p-value |
|------------------------------------------------------------|------------------------------|-------------------|---------------------|-------------------------|-------------------------|---------|
| Age, years                                                 | 68.9 ± 11.1                  | 67.1 ± 10.6       | 67.7 ± 10.4         | 70.5 ± 10.1             | 68.5 ± 11               | 0.1     |
| Male, n (%)                                                | 247 (64)                     | 18 (60)           | 70 (62)             | 57 (56)                 | 102 (71)                | 0.1     |
| VO <sub>2</sub> @peak, mL/min/kg                           | 15.7 (12.1-19.6)             | 23 (21.7- 29.7)   | 18 (15.4- 20.7)*    | 13.6 (11.8- 16.8)*†     | 14.2 (10.7- 17.5)*†     | <0.0001 |
| Workload @peak, W                                          | 90 (65-120)                  | 130 (115-195)     | 110 (84-130)*       | 70 (55-100)*†           | 80 (60-110)*†           | <0.0001 |
| Heart rate @peak, bpm                                      | 123 ± 22                     | 142 ± 12          | 130 ± 20*           | 115 ± 17*†              | 119 ± 23*†              | <0.0001 |
| Stroke volume @peak, mL                                    | 83 (71-99)                   | 98 (85-114)       | 86 (76-107)         | 83 (74-97)*             | 75 (63-95)*†            | <0.0001 |
| Average S <sup>''</sup> @peak, cm/s                        | 11.2 ± 3.8                   | 17.1 ± 3.9        | 13.3 ± 2.9*         | 10.6 ± 2.5*†            | 8.7 ± 2.7*†‡            | <0.0001 |
| TAPSE/PAPs @peak, mm/mmHg                                  | 0.75 (0.46-0.97)             | 1.05 (0.93- 1.16) | 0.81 (0.52- 0.91)*  | 0.52 (0.38- 0.83)*†     | 0.58 (0.41- 0.89)*†     | <0.0001 |
| Left atrial reservoir strain/E/e <sup>'</sup> @low-load, % | 2.25 (1.17-5.04)             | 6.23 (4.45-6.77)  | 4.34 (3.89- 5.58)*  | 2.23 (1.31- 2.86)*†     | 1.91 (1.07-2.44)*†‡     | <0.0001 |

\*  $p < 0.01$  vs Controls; †  $p < 0.01$  vs Stage A-B; ‡  $p < 0.01$  vs Stage C-HFpEF. **PAPs**: systolic pulmonary artery pressure; TAPSE: tricuspid annular plane systolic excursion; VO<sub>2</sub>: oxygen consumption.  
Abstract Figure 1

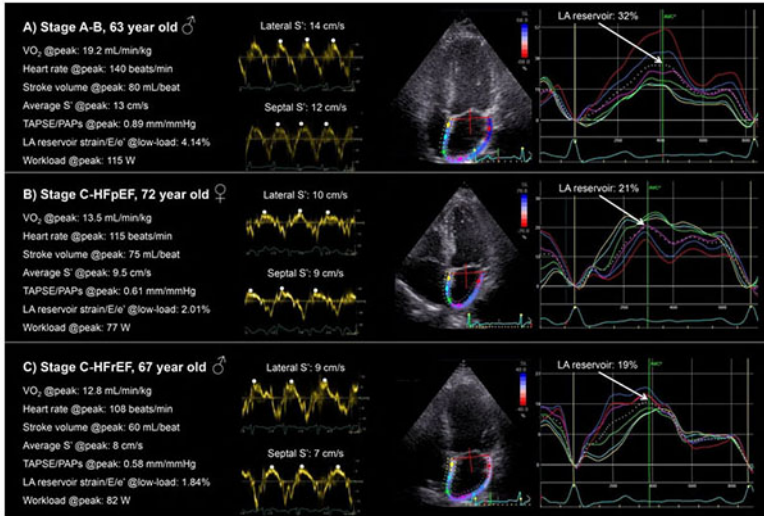

Source: http://academic.oup.com/ehjcimaging/article-pdf/22/Supplement_1/jeaa356.210/36215320/jeaa356.210.pdf
